# Supplementary material
Source: PubMed Central journal article supplement (PMC9130248)

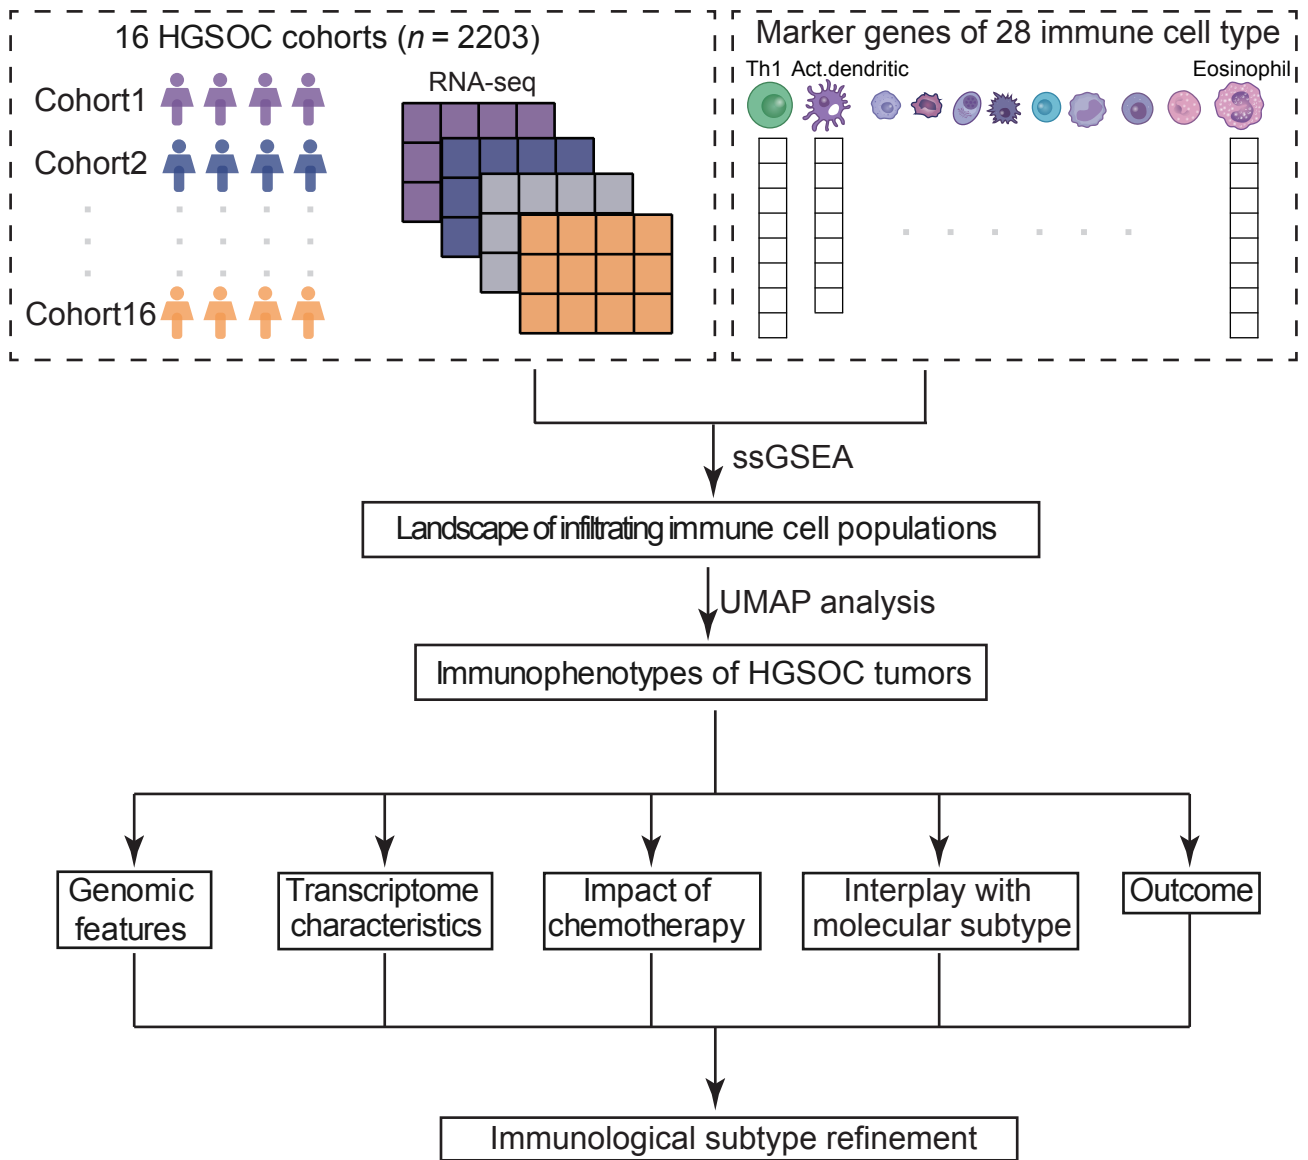

Supplement: 41416_2021_1692_MOESM1_ESM.pdf [file 41416_2021_1692_MOESM1_ESM.pdf]

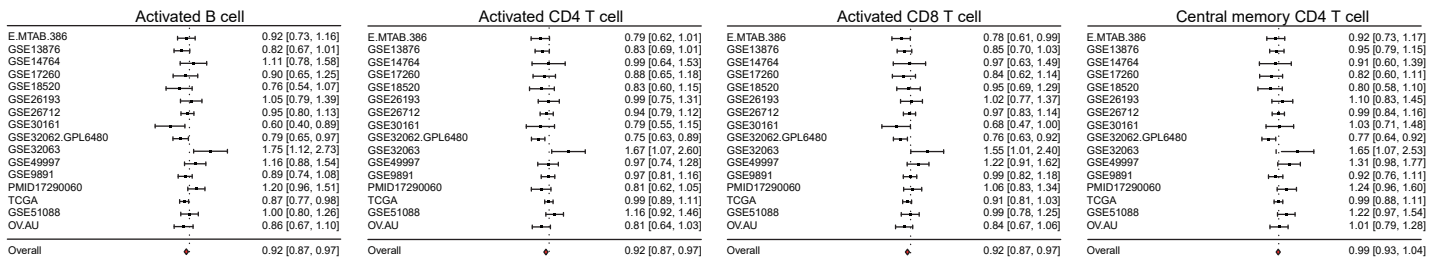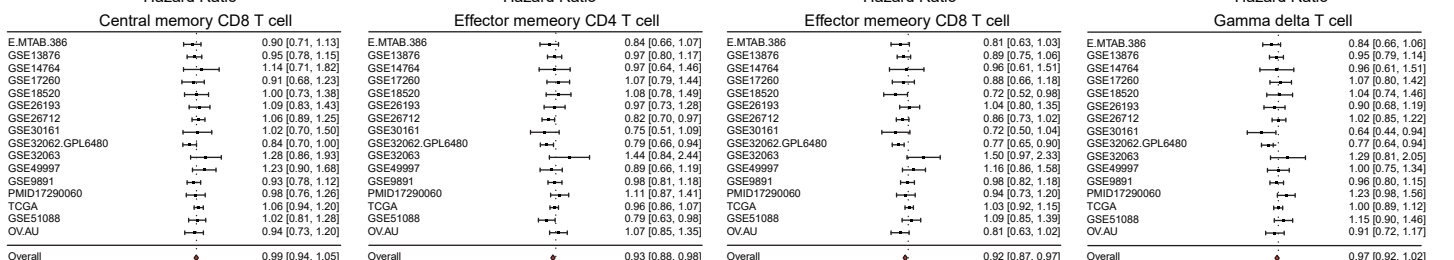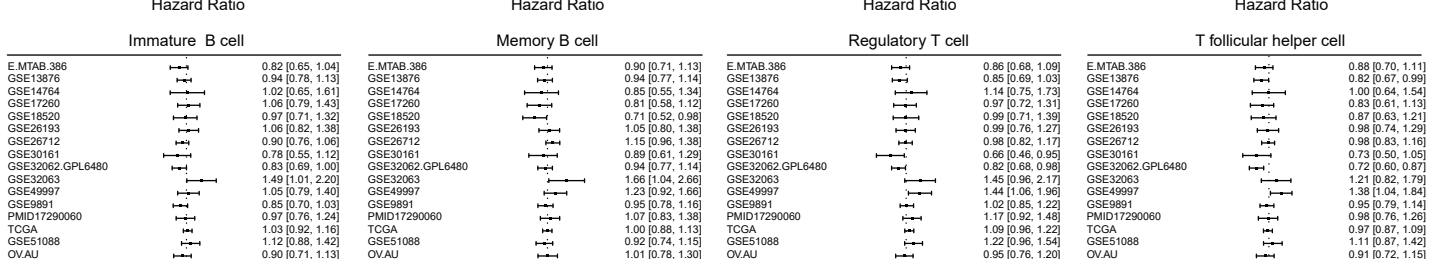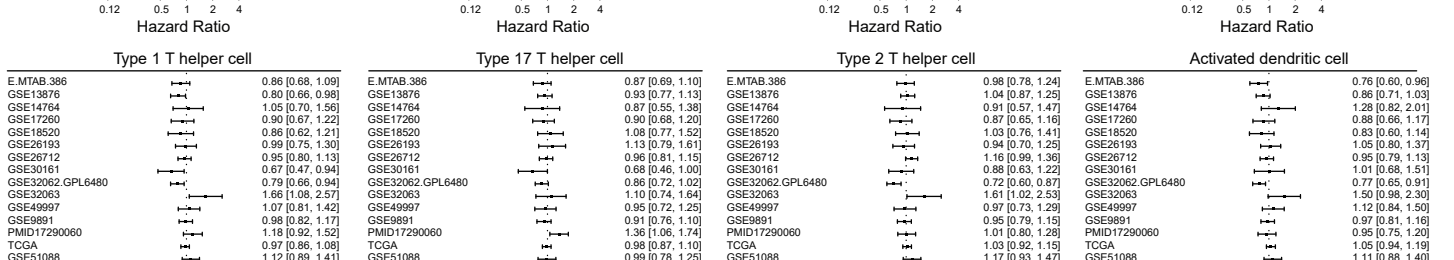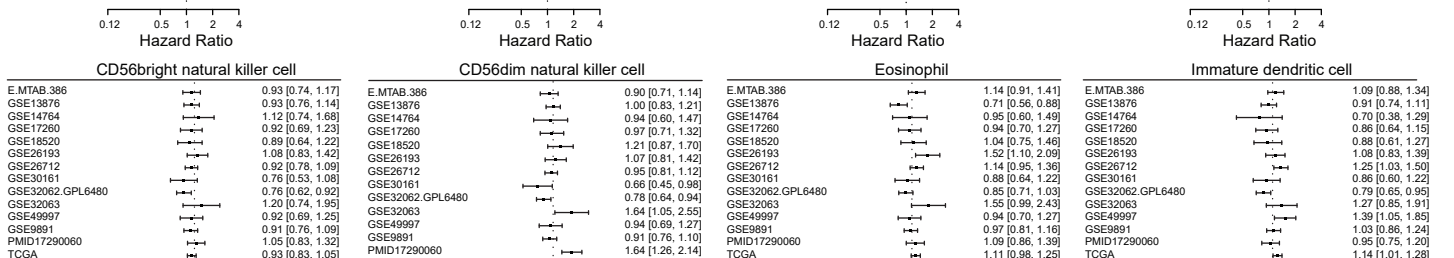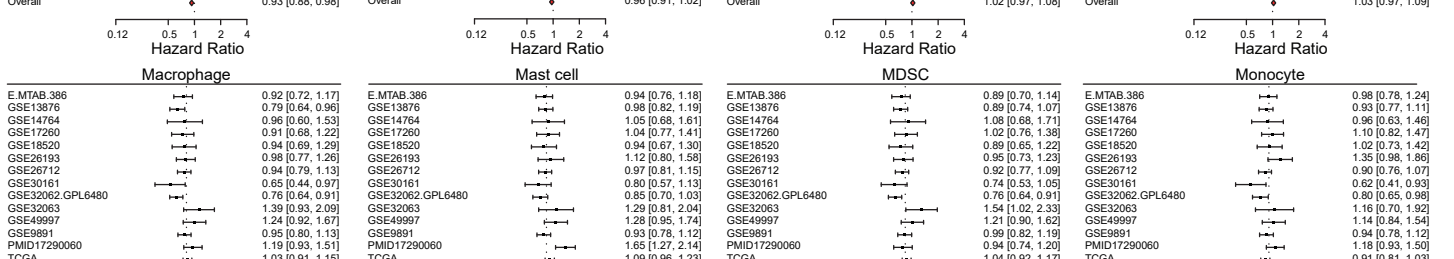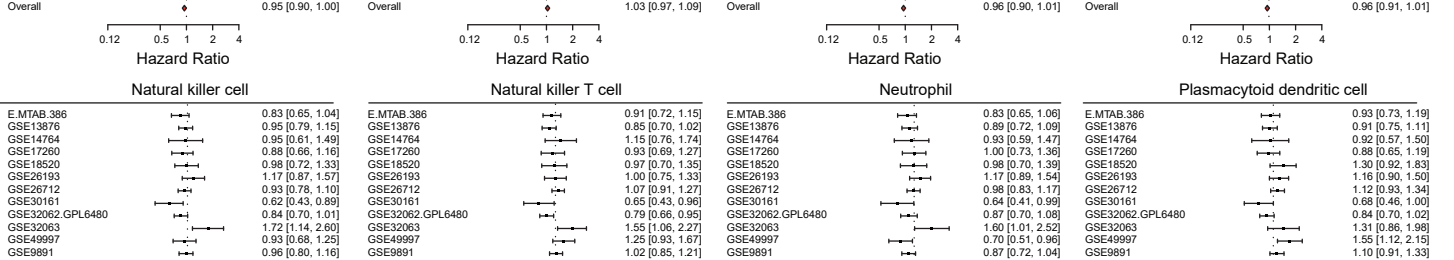

Supplement: 41416_2021_1692_MOESM2_ESM.pdf [file 41416_2021_1692_MOESM2_ESM.pdf]
